# Supplementary material for: Modeling Multi-Temporal Fire Niches for Wildfire Susceptibility Mapping Using Active Fire Data
Source: Research Square preprint supplement (doi:10.21203/rs.3.rs-7887745/v1), 2025-11-07

**Supplementary**

**Supplementary A.** Spatial distribution of independent variables associated with climatic factors across different temporal scales. (A) Warm season, (B) Cold season, (C) Annual period.


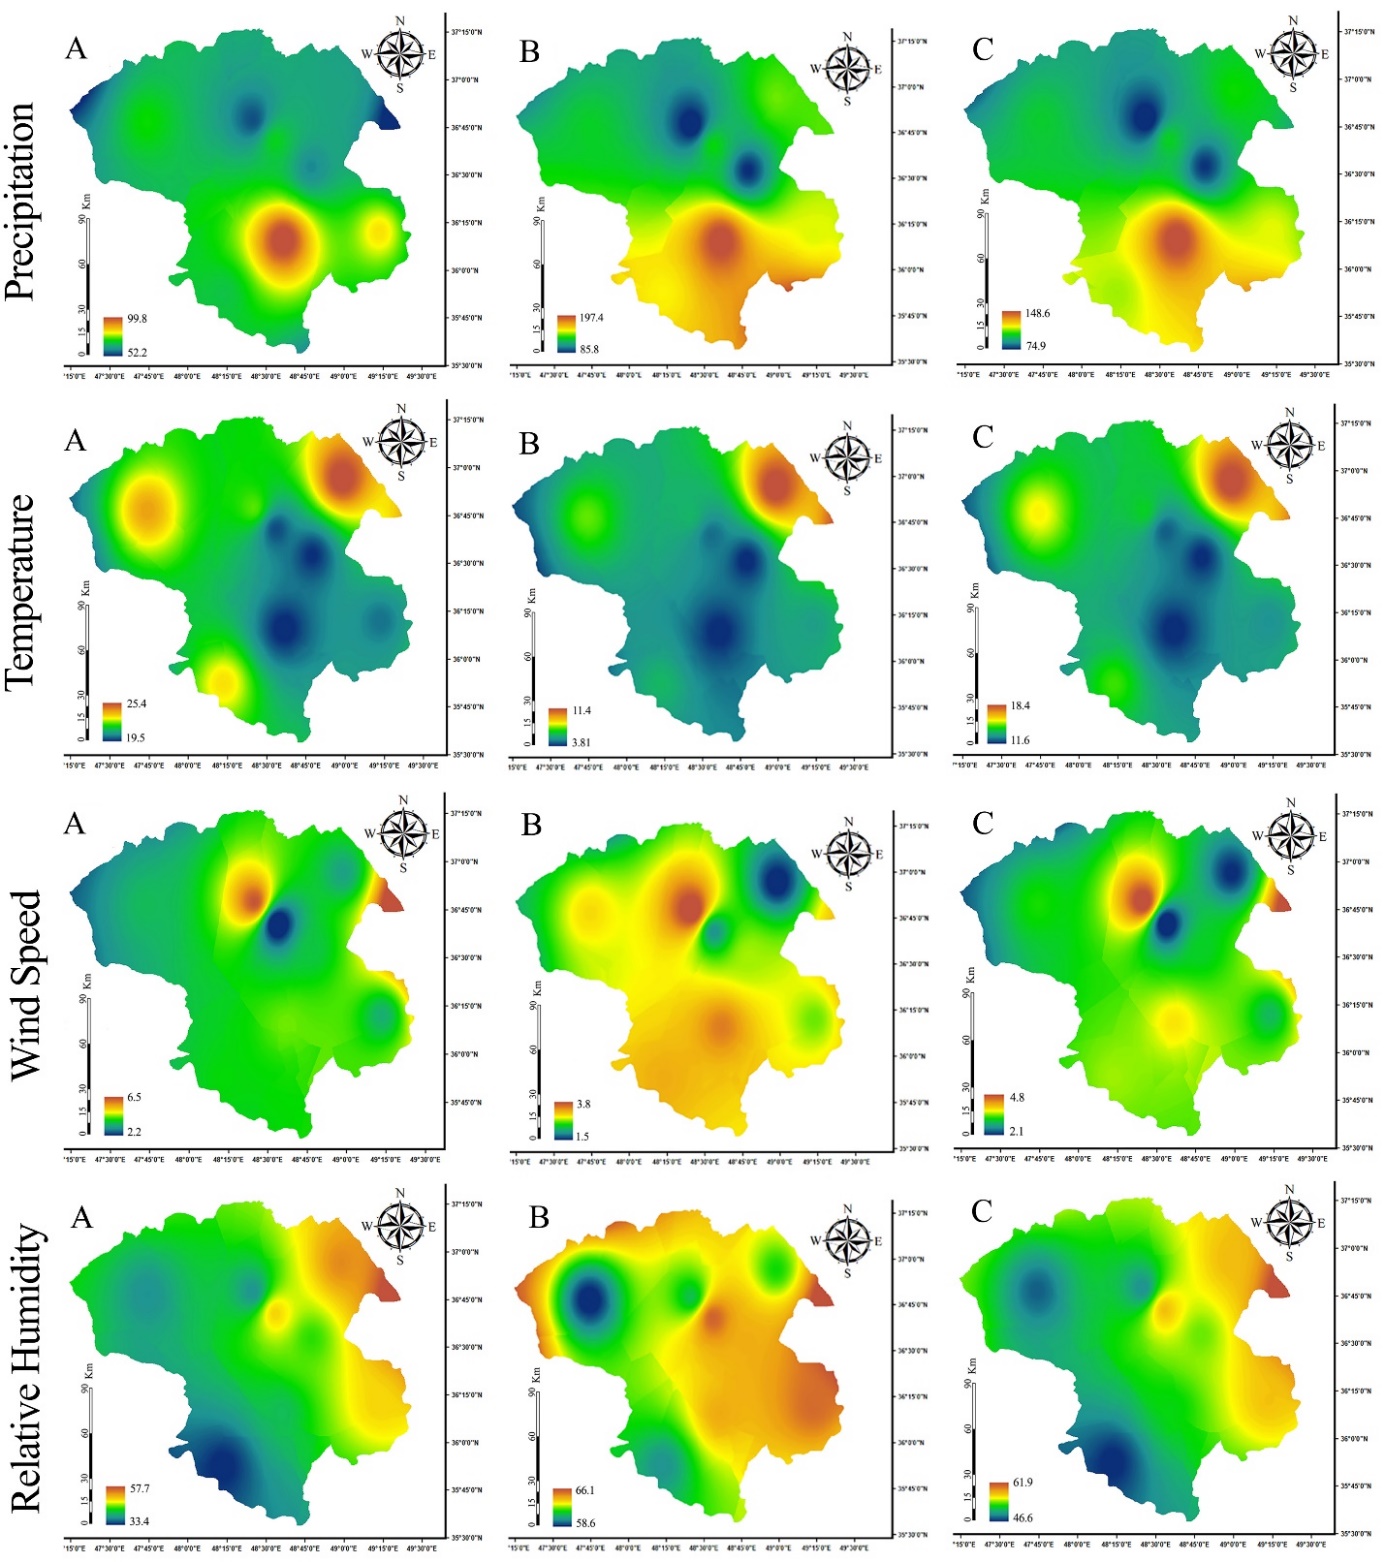


**Supplementary B.** Spatial distribution of landform variables and anthropogenic activity indicators in the study area. (A) Aspect, (B) TWI, (C) DTB, and (D) DTR.


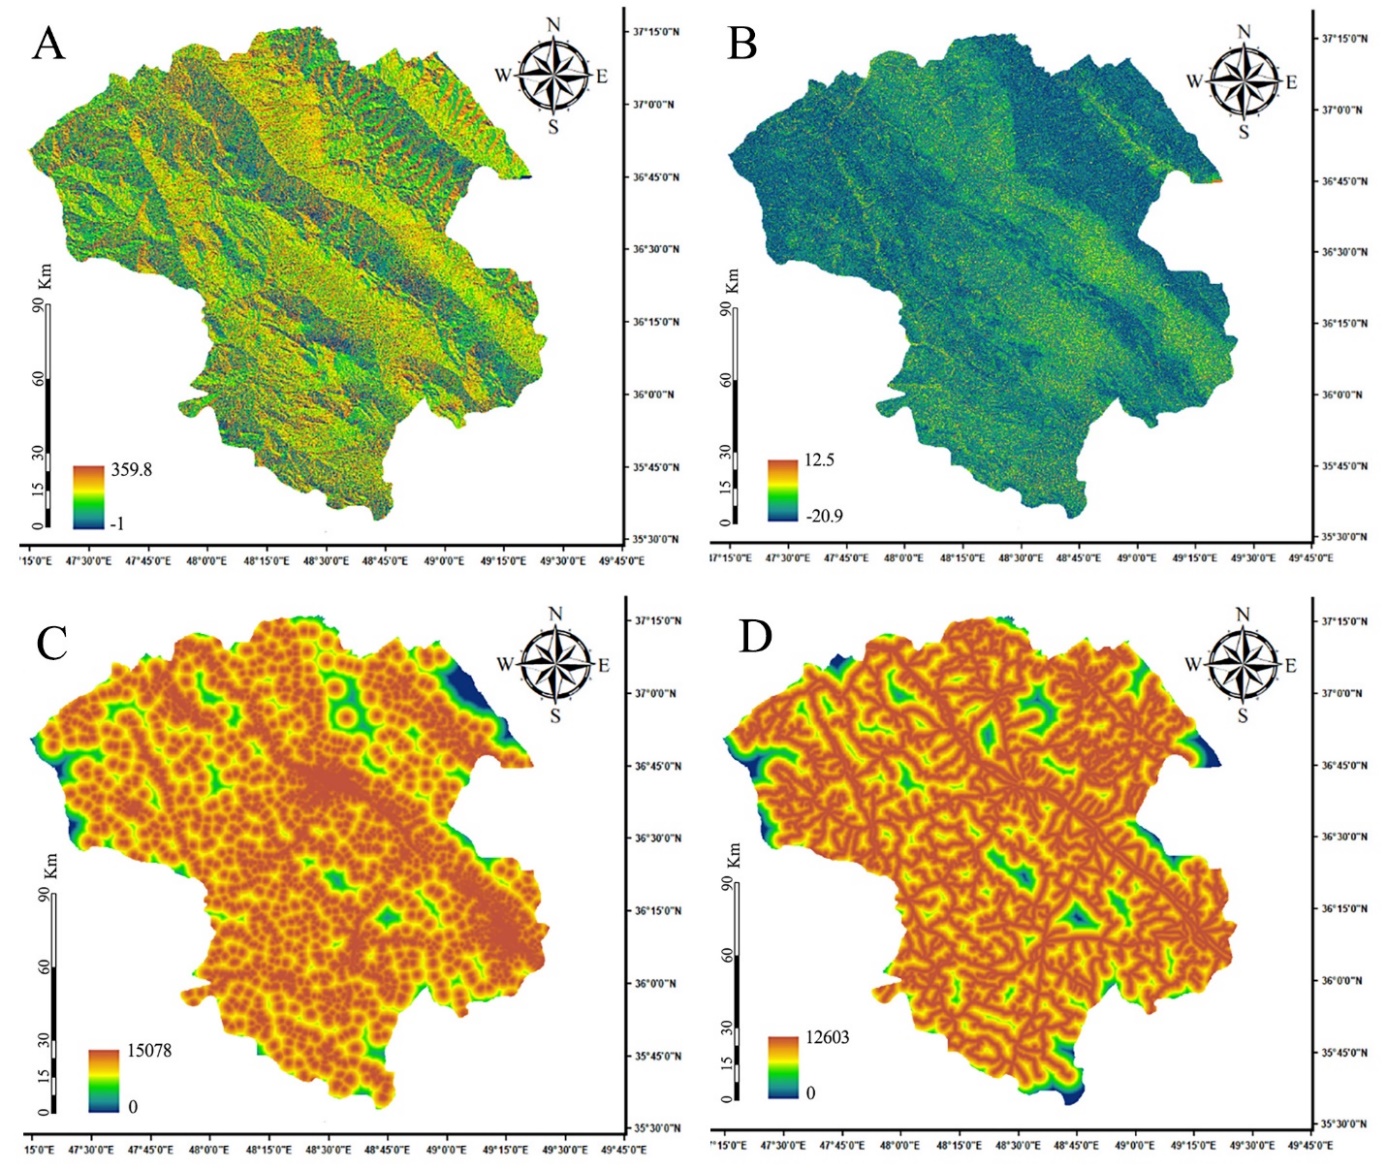

Supplement: Supplementary file 1 [file 24ce7018bd562a6fbe0b9364.docx]
